# Supplementary material for: Brief communication: Sharp precipitation gradient on the southern edge of the Tibetan Plateau during cold season
Source: Copernicus journal article supplement (doi:10.5194/tc-19-5863-2025), 2025-11-18
Supplement: Supplementary file 1 [file tc-19-5863-2025-supplement.pdf]

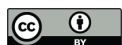

*Supplement of*

**Brief communication: Sharp precipitation gradient on the southern edge of the Tibetan Plateau during cold season**

**Titouan Biget et al.**

*Correspondence to:* Titouan Biget ([titouan.bgt@gmail.com](mailto:titouan.bgt@gmail.com))

The copyright of individual parts of the supplement might differ from the article licence.

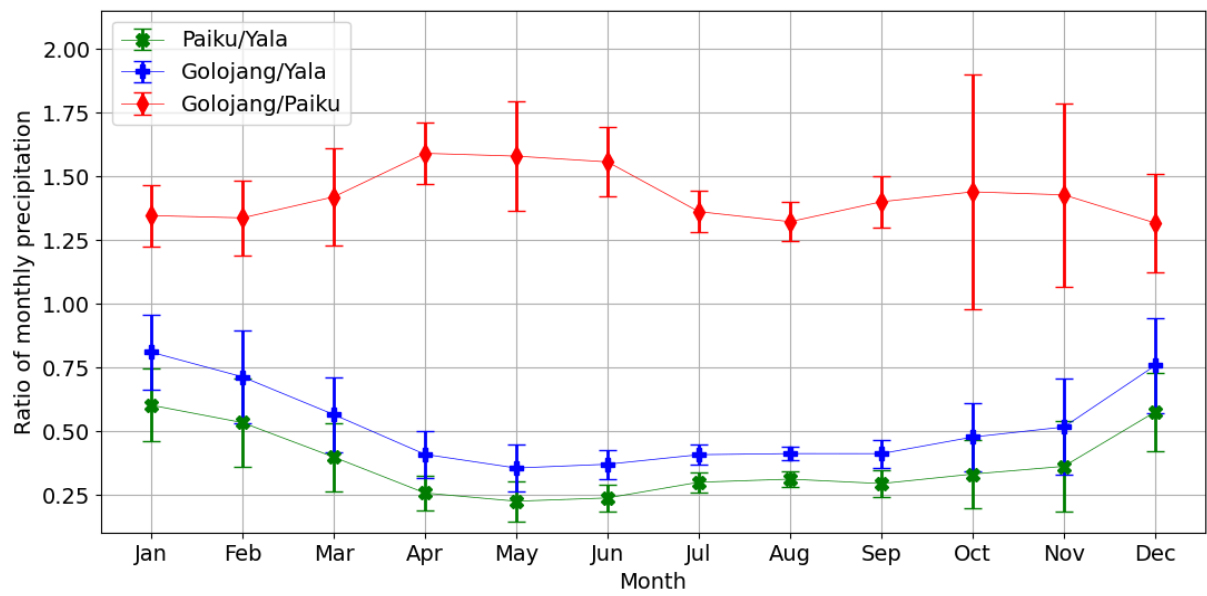

**Figure S1:** Ratios of mean monthly precipitation between different locations (Paiku/Yala, Golojang/Yala, Golojang/Paiku), calculated from ERA5-Land data for the period 1992–2021. Each point represents the mean ratio for a given month, and the error bars indicate  $\pm 1$  standard deviation of monthly precipitation over the 30-year period.

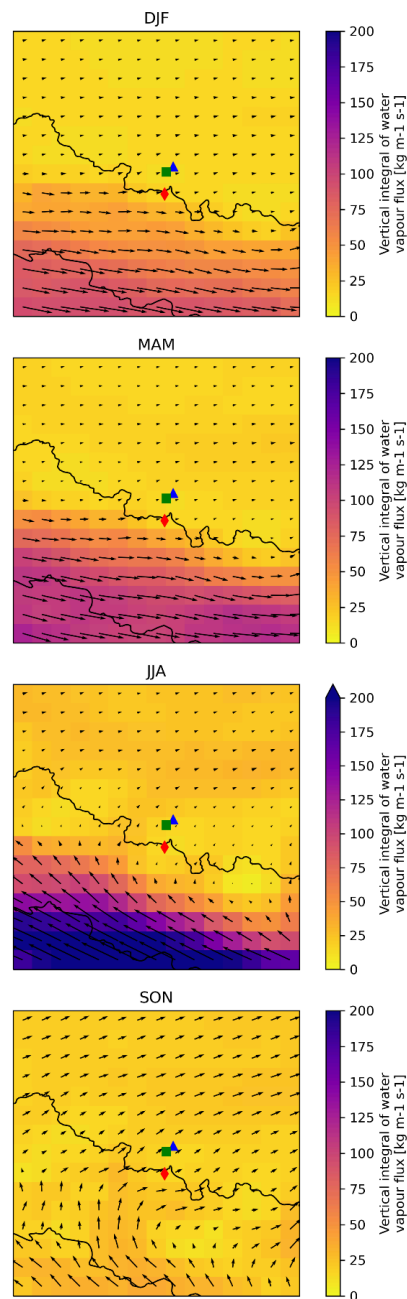

**Figure S2:** Vertical integral of water vapor flux from ERA5 reanalysis for the period 1993–2023. The red diamond shows the location of Yala AWS, the green square Golojang Co and the blue triangle Paiku AWS.
